# Supplementary material for: The decisive role of Au in CO diffusion on Pt surfaces: a DFT study
Source: Royal Society of Chemistry journal article supplement (doi:10.1039/d4cp03618b), 2024-01-01
Supplement: d4cp03618b3.pdf [file d4cp03618b3.pdf]

## Supporting Information

### “The decisive role of Au in the CO diffusion on Pt surfaces: a DFT study”

Ana Lucía Reviglio\*<sup>a,b</sup>, Paula S. Cappellari\*<sup>a,c</sup>, German M. Soldano\*<sup>d,e</sup>, Marcelo M. Mariscal<sup>d,e</sup> and Gabriel A. Planes<sup>a,c</sup>

<sup>a</sup> IITEMA, CONICET, Universidad Nacional de Río Cuarto, Ruta Nac. 36, Km 601, Río Cuarto, Córdoba 5800, Argentina.

<sup>b</sup> Departamento de Física, Facultad de Ciencias Exactas. Físico-Químicas y Naturales, Universidad Nacional de Río cuarto, Ruta Nac. 36, Km 601, Río Cuarto, Córdoba 5800, Argentina.

<sup>c</sup> Departamento de Química, Facultad de Ciencias Exactas. Físico-Químicas y Naturales, Universidad Nacional de Río cuarto, Ruta Nac. 36, Km 601, Río Cuarto, Córdoba 5800, Argentina.

<sup>d</sup> INFIQC, CONICET, Universidad Nacional de Córdoba, XUA5000 Córdoba, Argentina.

<sup>e</sup> Departamento de Química Teórica y Computacional, Facultad de Ciencias Químicas, Universidad Nacional de Córdoba, XUA5000 Córdoba, Argentina.

\*Corresponding authors

e-mail addres: [areviglio@exa.unrc.edu.ar](mailto:areviglio@exa.unrc.edu.ar); [pcappellari@exa.unrc.edu.ar](mailto:pcappellari@exa.unrc.edu.ar);  
[german.soldano@unc.edu.ar](mailto:german.soldano@unc.edu.ar)

## CO Adsorption Energies on Pt(111) with and without Au

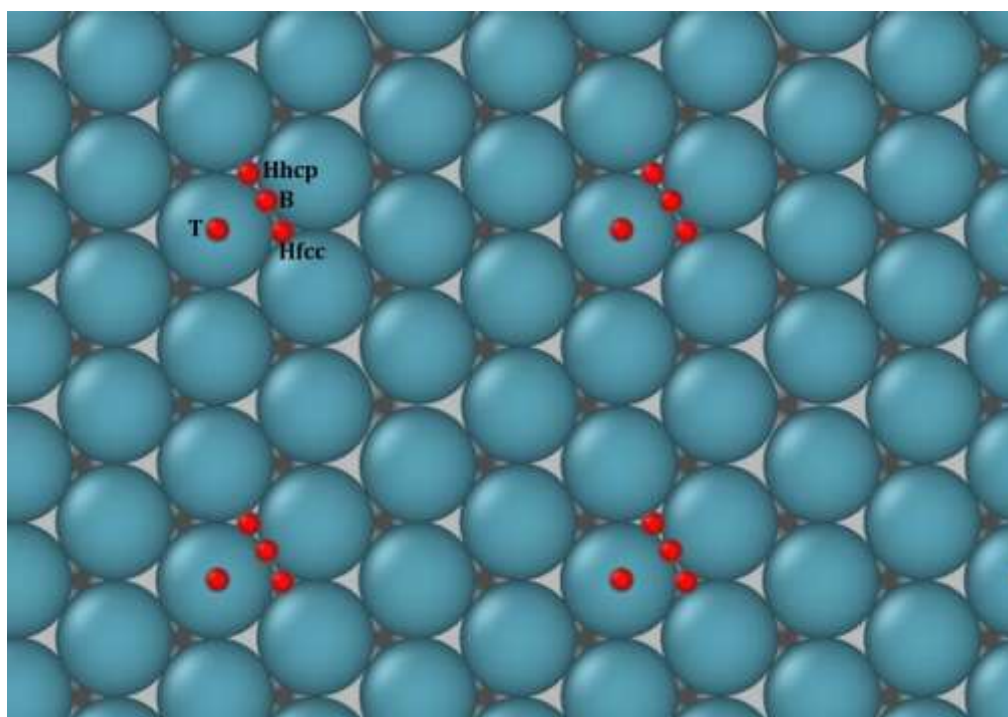

Figure S1: Top view of CO sites on Pt(111)

| Site       | $E_{\text{ad}}$ (eV) |
|------------|----------------------|
| Bridge     | -2.40                |
| Hollow fcc | -2.49                |
| Hollow hcp | -2.45                |
| Top        | -2.28                |

Table S1: Adsorption energies of CO on Pt(111)

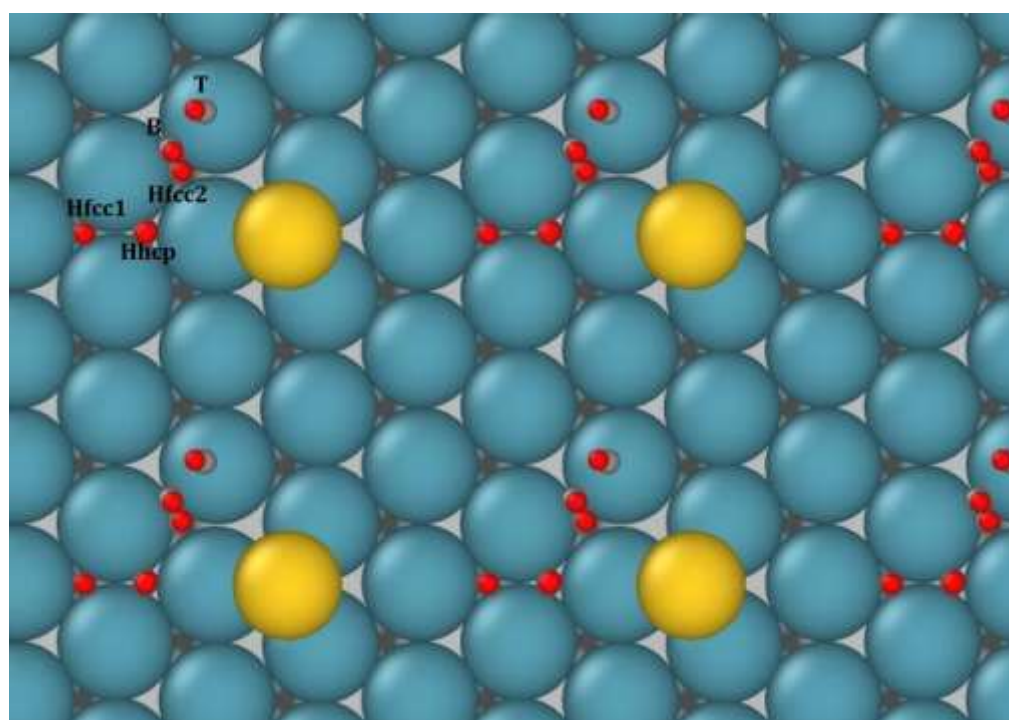

Figure S2: Top view of CO sites on Pt(111)-1Au

| Site  | $E_{\text{ad}}$ (eV) |
|-------|----------------------|
| B     | -2.37                |
| Hfcc1 | -2.49                |
| Hfcc2 | -2.37                |
| Hhcp  | -2.40                |
| T     | -2.06                |

Table S2: Adsorption energies of CO on Pt(111)-1Au

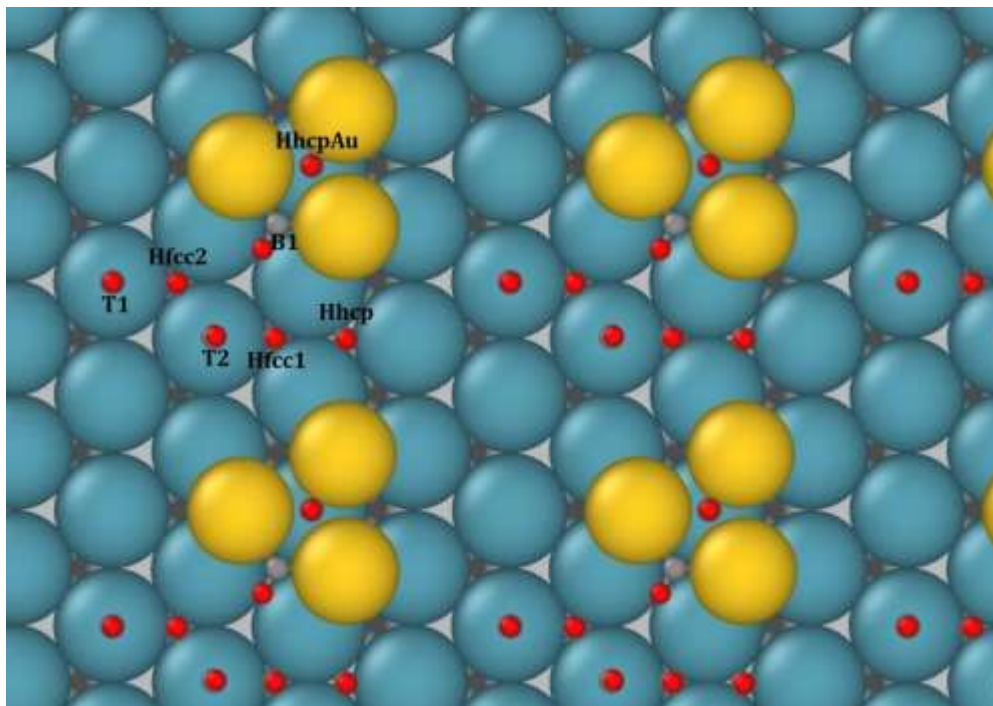

| Site    | $E_{ad}$ (eV) |
|---------|---------------|
| B1      | -1.25         |
| Hfcc1   | -2.14         |
| Hfcc2   | -2.21         |
| Hhcp Au | -1.15         |
| Hhcp    | -1.90         |
| T1      | -1.98         |
| T2      | -2.01         |

Table S3: Adsorption energies of CO on Pt(111)-3Au

Figure S3: Top view of CO sites on Pt(111)-3Au

### NEB calculation over Pt(111)

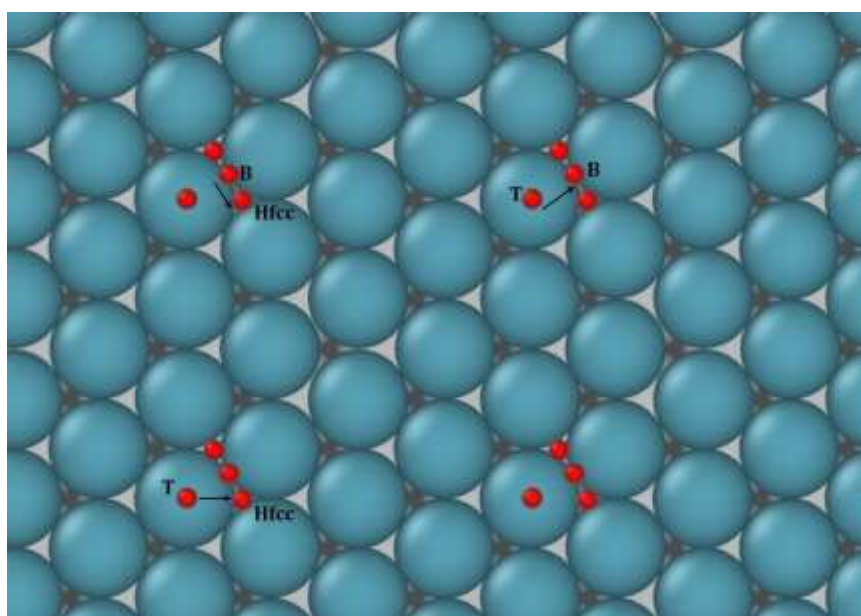

Figure S4: NEB path for CO over Pt(111)

| Initial Site | Final Site | $E_{act}$ (eV) $\rightarrow$ | $E_{act}$ (eV) $\leftarrow$ |
|--------------|------------|------------------------------|-----------------------------|
| B            | Hfcc       | 0.00                         | 0.05                        |
| T            | B          | 0.10                         | 0.18                        |
| T            | Hfcc       | 0.12                         | 0.24                        |

Table S4: Activation energies for CO over Pt(111)



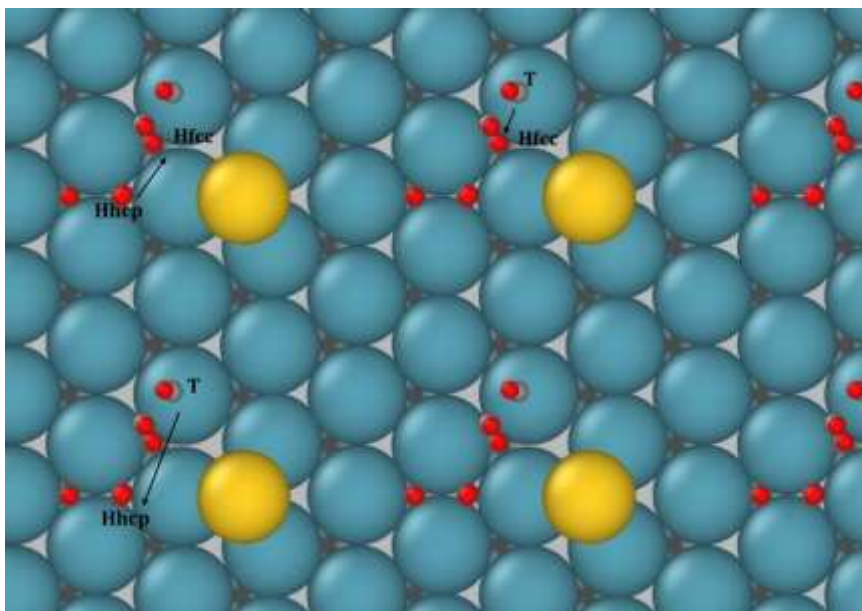

Figure S5: NEB path for CO over Pt(111)-1Au

| Initial Site | Final Site | $E_{\text{act}}$ (eV) $\rightarrow$ | $E_{\text{act}}$ (eV) $\leftarrow$ |
|--------------|------------|-------------------------------------|------------------------------------|
| Hhcp         | Hfcc       | 0.06                                | 0.06                               |
| T            | Hfcc       | 0.16                                | 0.21                               |
| T            | Hhcp       | 0.07                                | 0.11                               |

Table S5: Activation energies for CO over Pt(111)-1Au

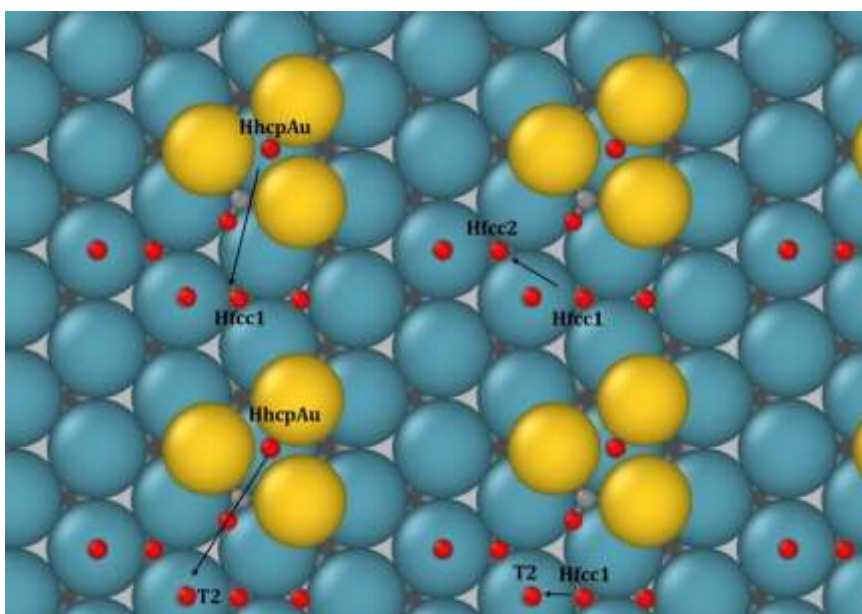

Figure S6: NEB path for CO over Pt(111)-3Au

| Initial Site | Final Site | $E_{\text{act}}$ (eV) $\rightarrow$ | $E_{\text{act}}$ (eV) $\leftarrow$ |
|--------------|------------|-------------------------------------|------------------------------------|
| Hhcp Au      | Hfcc1      | 0.00                                | 0.91                               |
| Hhcp Au      | T2         | 0.03                                | 0.94                               |
| Hfcc1        | Hfcc2      | 0.13                                | 0.22                               |
| Hfcc1        | T2         | 0.21                                | 0.21                               |

Table S6: Activation energies for CO over Pt(111)-3Au
